# Supplementary material for: Synthesis of a bis[2-(2′-hydroxyphenyl)benzoxazole]pyridinium derivative: the fluoride-induced large spectral shift for ratiometric response
Source: Royal Society of Chemistry journal article supplement (doi:10.1039/d1nj00044f), 2021-01-01
Supplement: d1nj00044f1.pdf [file d1nj00044f1.pdf]

# Synthesis of a *Bis*[2-(2'-hydroxyphenyl)benzoxazole]pyridinium Derivative: The Fluoride-Induced Large Spectral Shift for Ratiometric Response

Chathura S. Abeywickrama<sup>a</sup> and Yi Pang<sup>a,b</sup> \*

<sup>a</sup>Department of Chemistry & <sup>b</sup>Maurice Morton Institute of Polymer Science, University of  
Akron, Akron, Ohio 44325, USA.

## Supporting Information

---

\* Corresponding author. E-mail: [yp5@uakron.edu](mailto:yp5@uakron.edu)

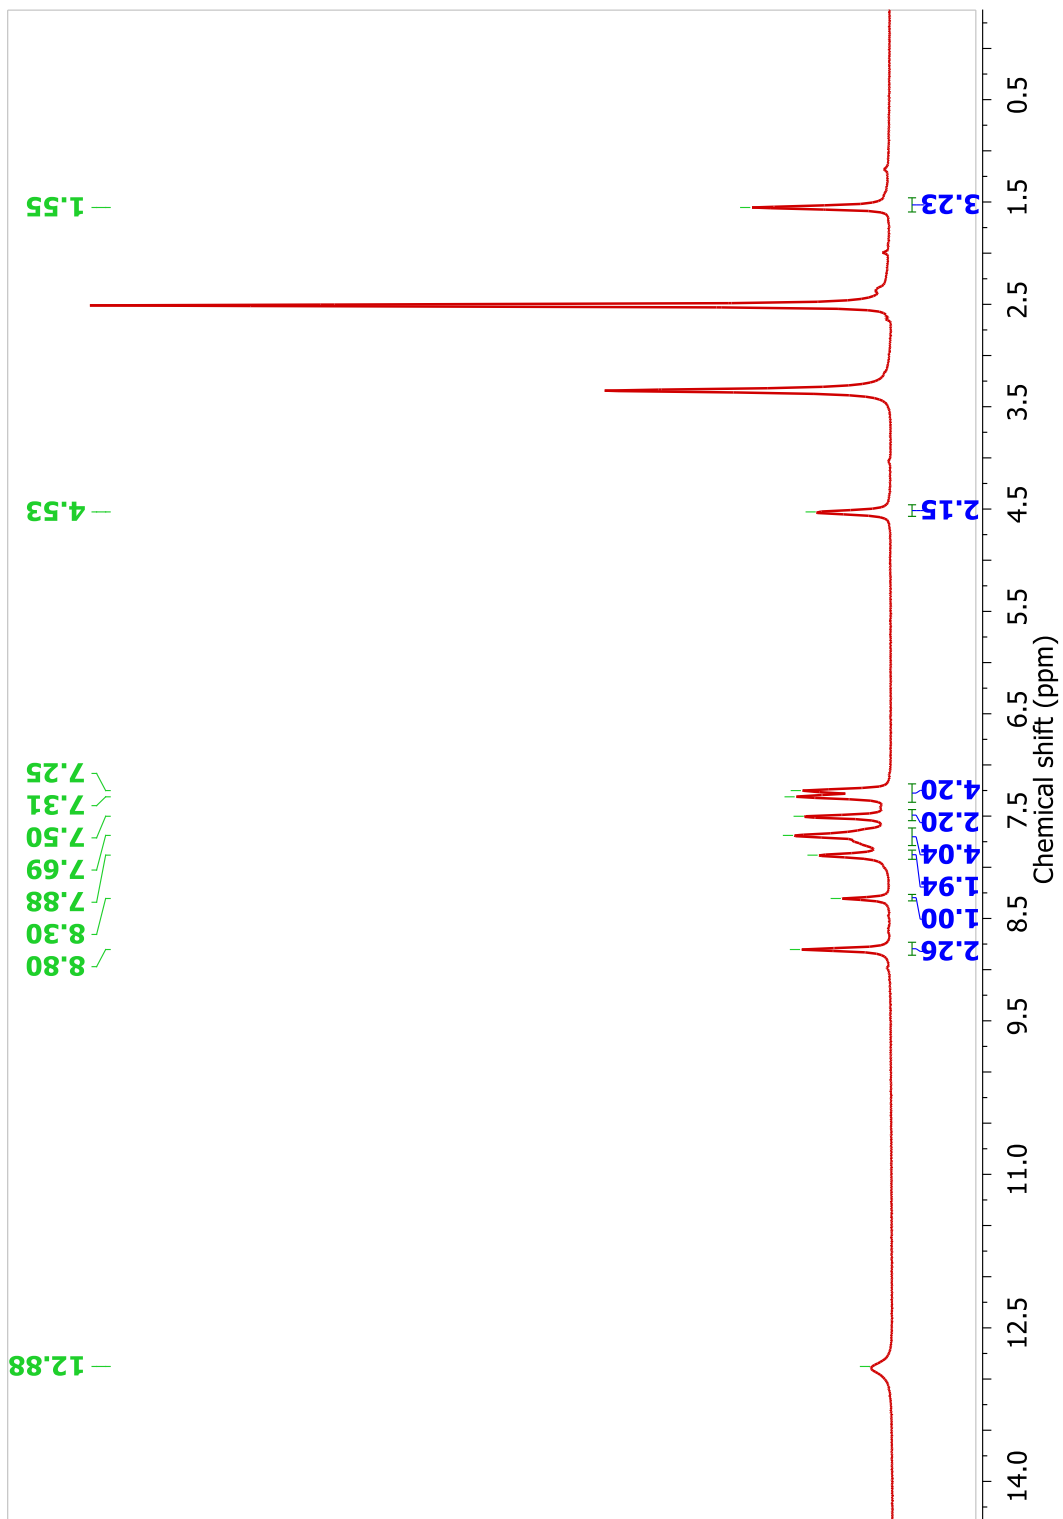

**Figure S1.1**  $^1\text{H}$  NMR (500 MHz in  $\text{DMSO-}d_6$ ) of **3**.

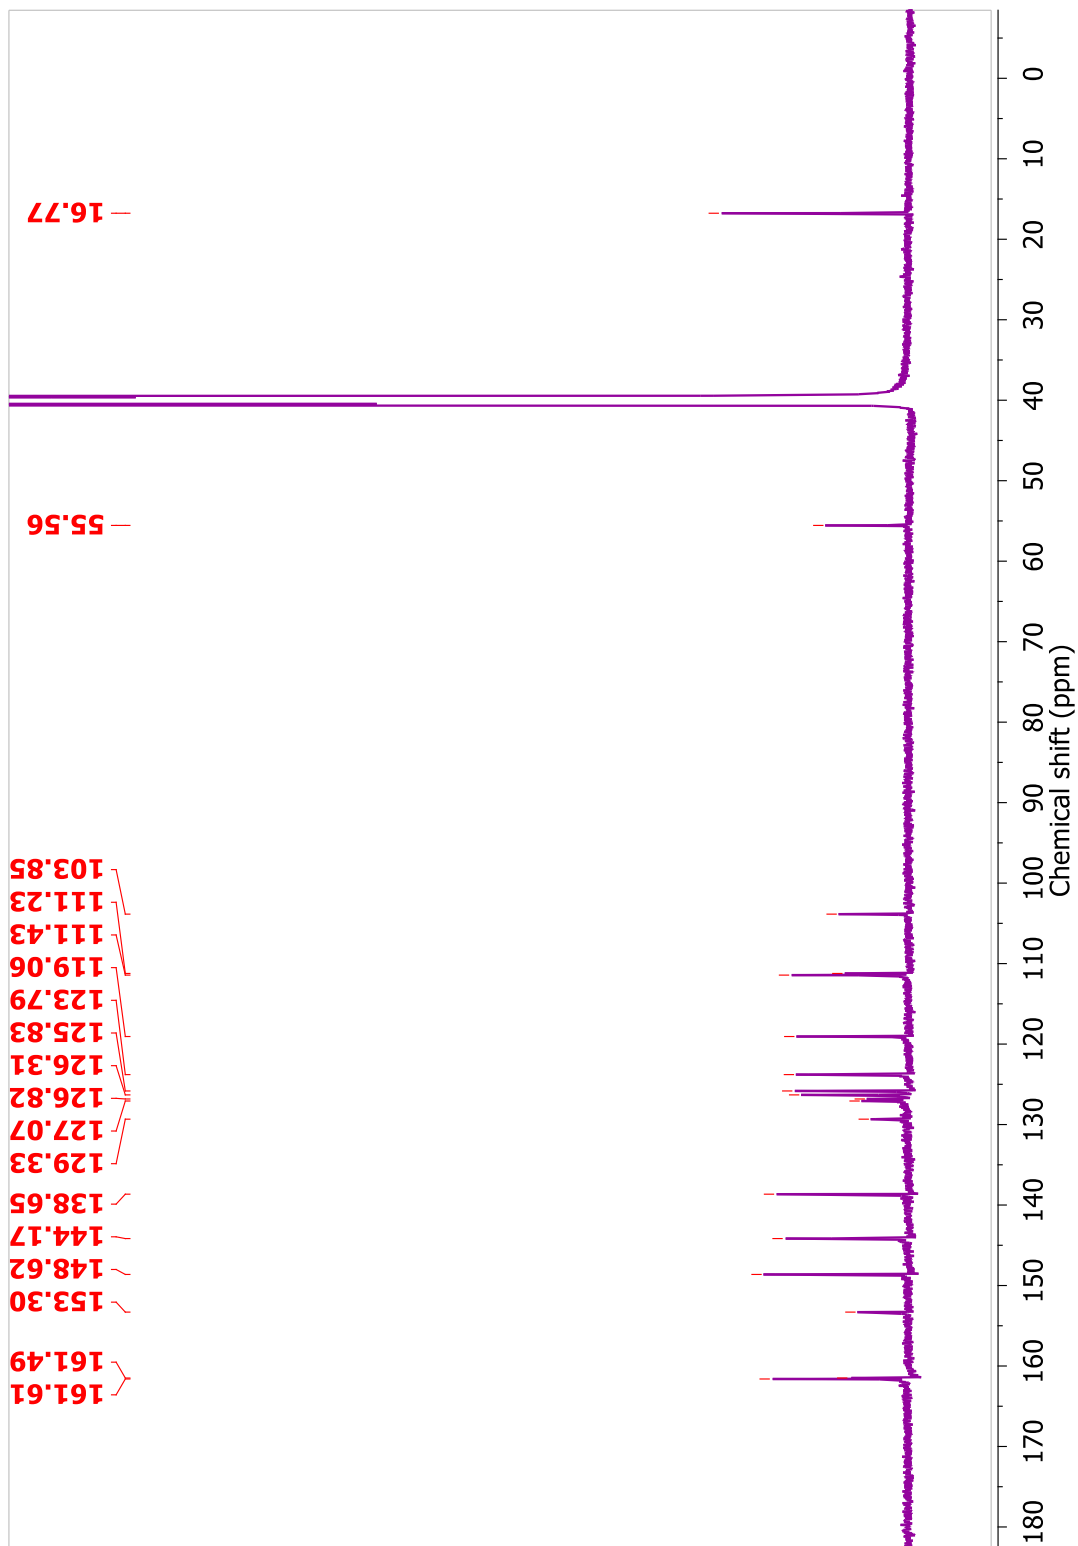

**Figure S1.2**  $^{13}\text{C}$  NMR (500 MHz in  $\text{DMSO-}d_6$ ) of **3**.

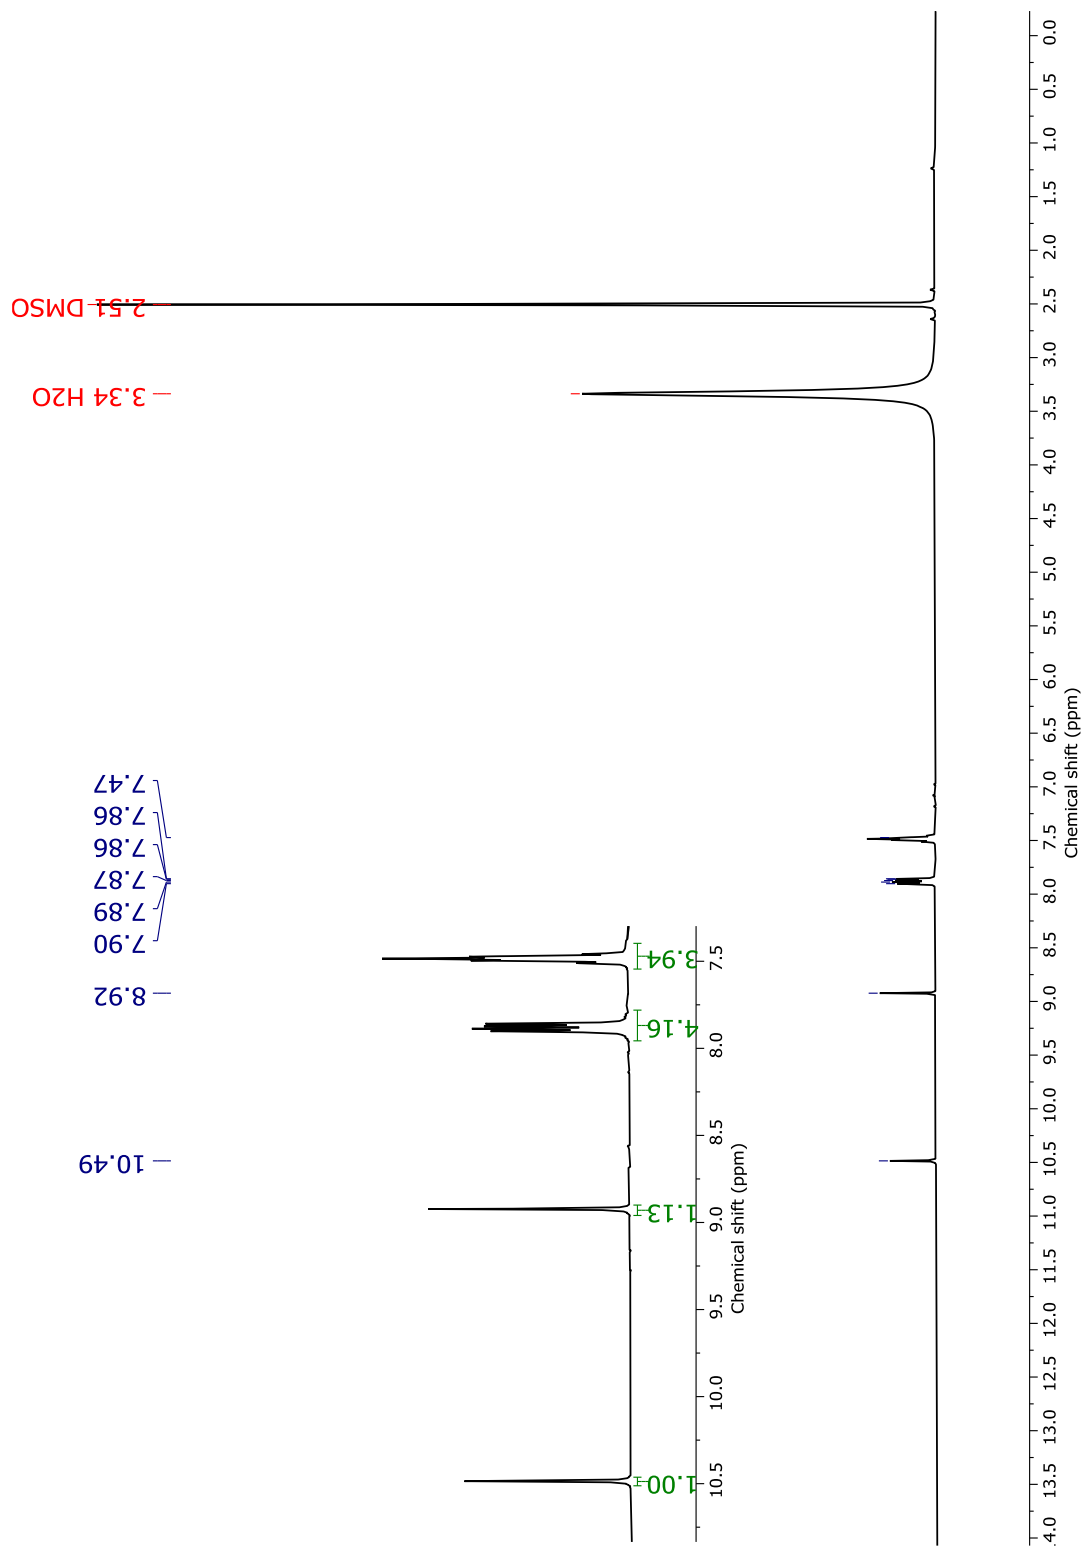

**Figure S1.3**  $^1\text{H}$ NMR (500 MHz in  $\text{DMSO-}d_6$ ) of **2**.

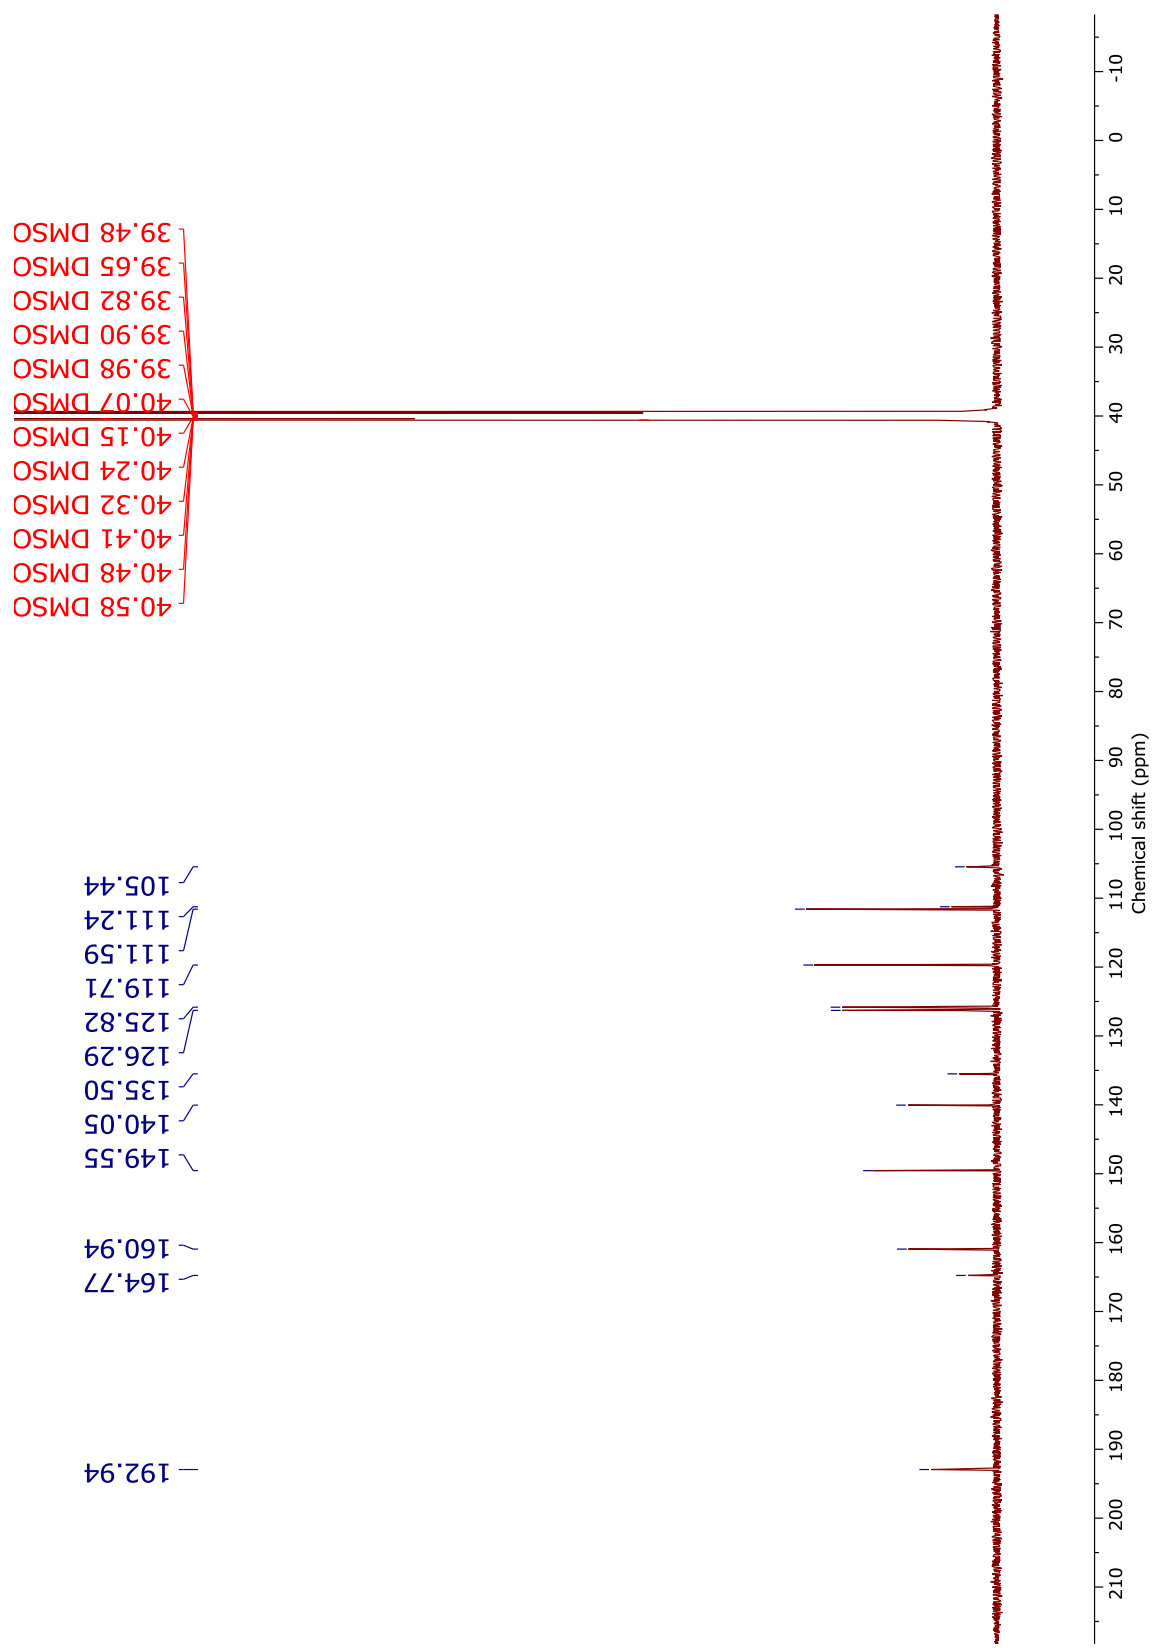

Figure S1.4  $^{13}\text{C}$ NMR (500 MHz in DMSO-*d*<sub>6</sub>) of **2**.

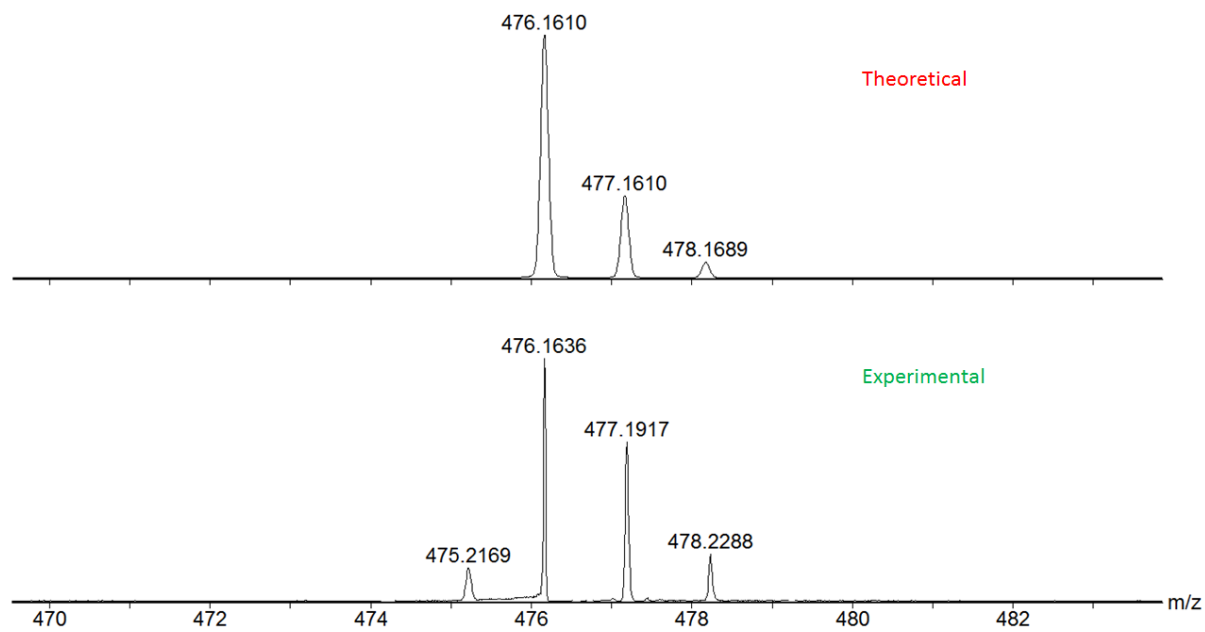

**Figure S2.1** High-resolution mass spectrometric analysis (theoretical vs experimental mass) of probe **3**. The error for the ESI mass spectra is 5 ppm.

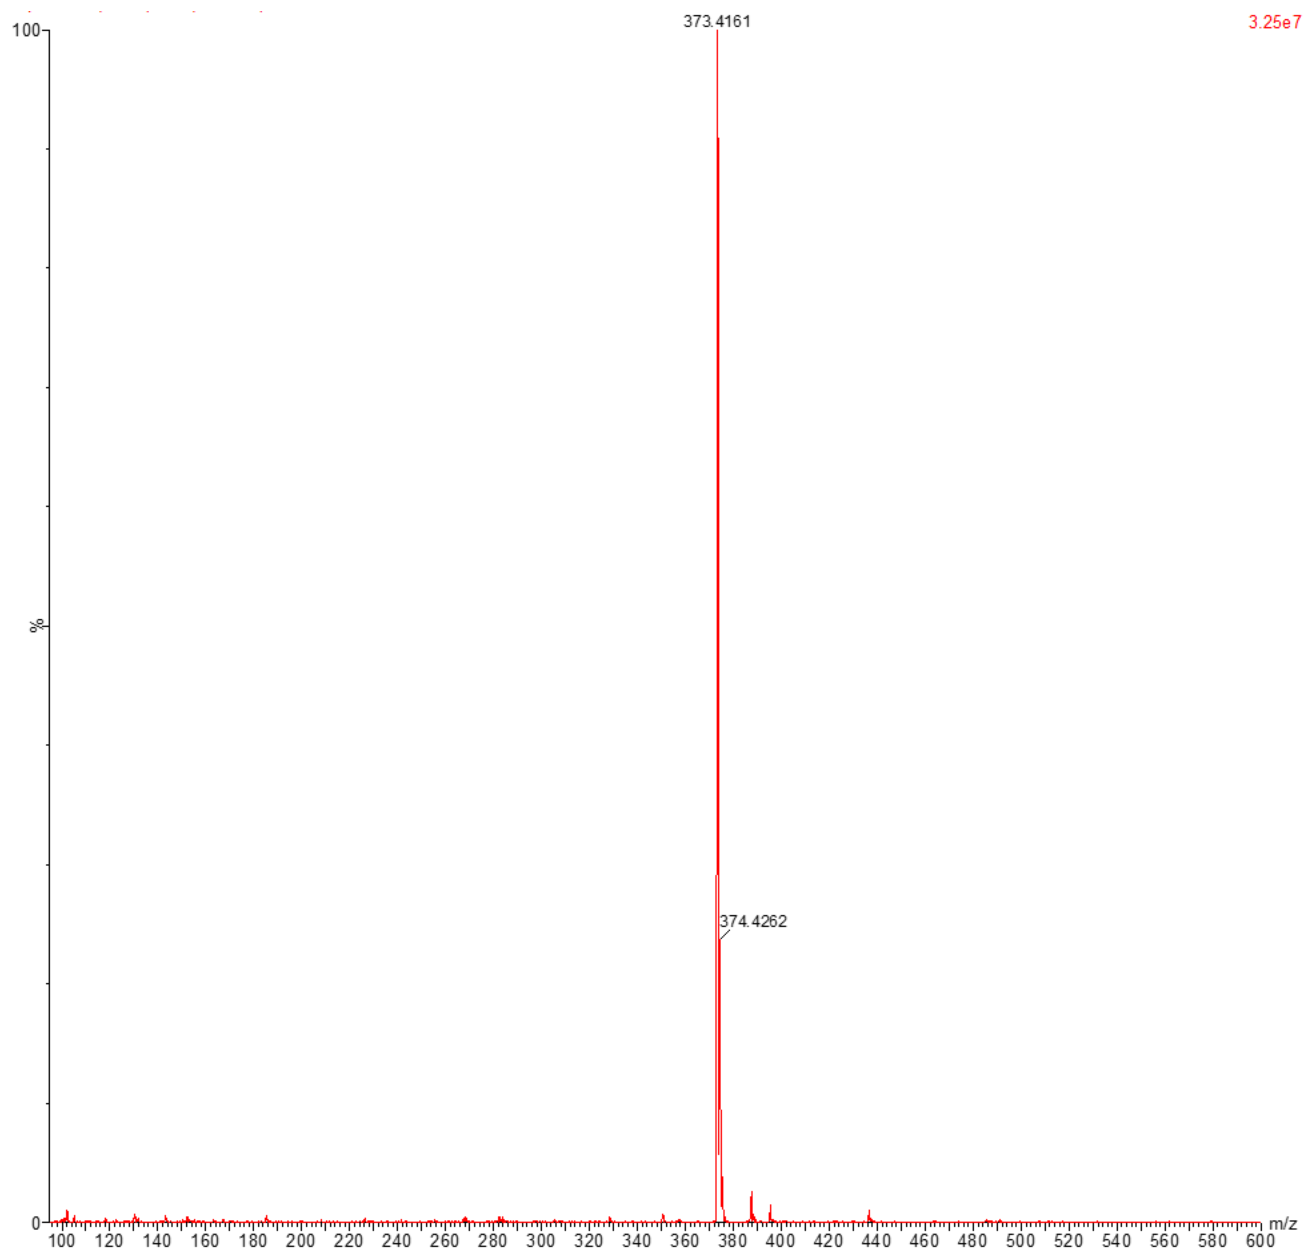

**Figure S2.2** High-resolution mass spectrometric analysis of probe **2**.

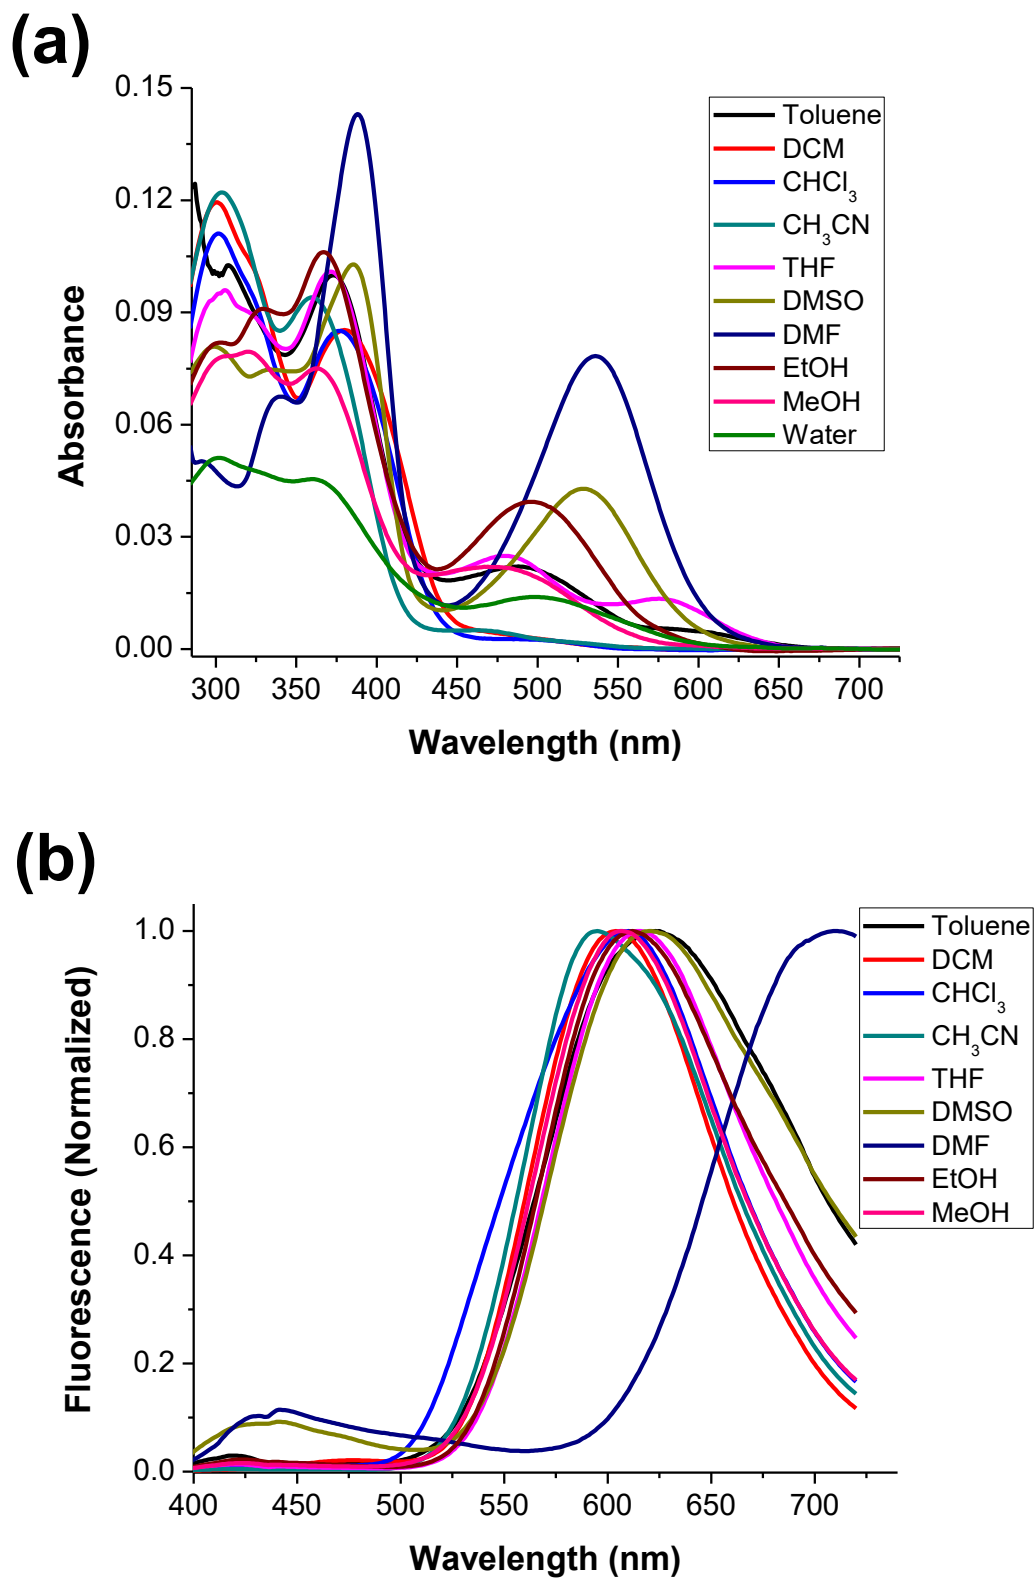

**Figure S3.** UV-vis (a) and normalized fluorescence spectra (excited at 390 nm) (b) of **3** ( $1 \times 10^{-5}$  M) in different solvents at room temperature.



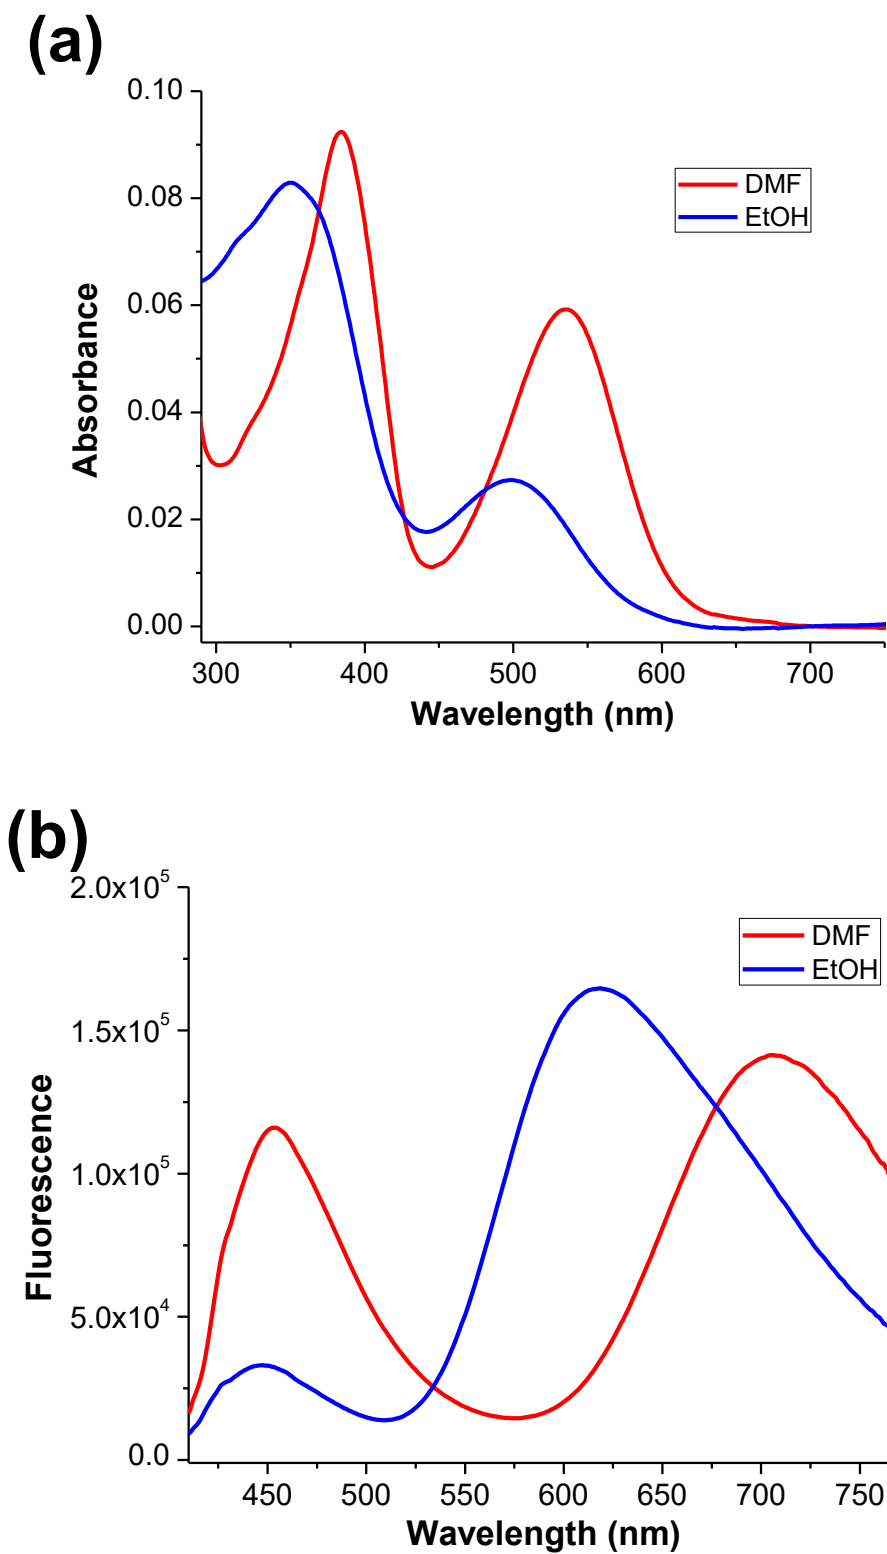

**Figure S4.** UV-vis (a) and normalized fluorescence spectra (excited at 390 nm) (b) of **3** ( $1 \times 10^{-5}$  M) in DMF and ethanol at room temperature.

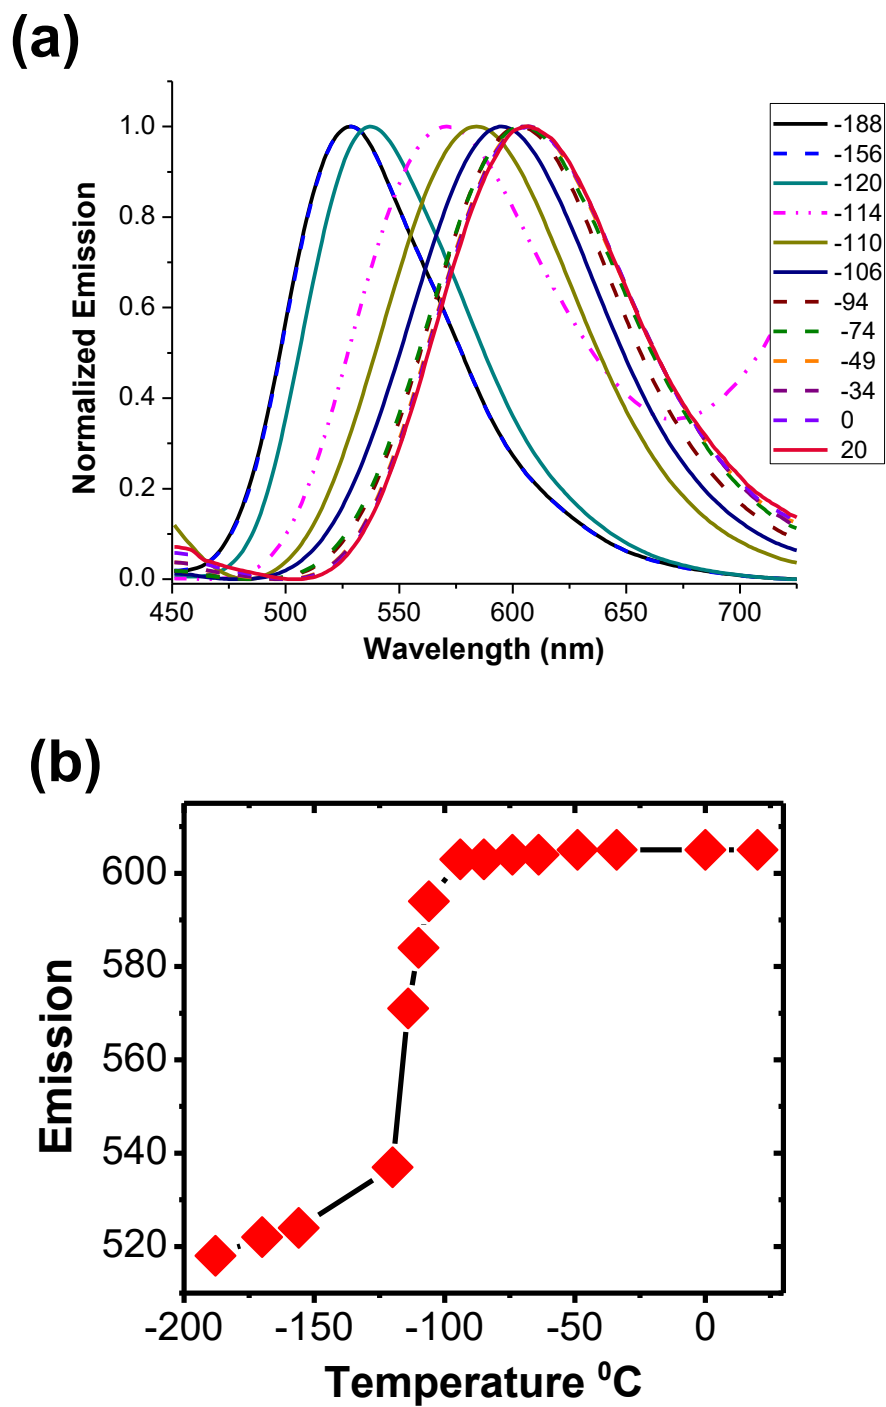

**Figure S5.** (a) Represents the normalized fluorescence spectra obtained for **3** ( $1 \times 10^{-5}$  M) in ethanol in different temperatures. (b) represents the recorded fluorescence intensity as a function of temperature. Probe **3** was excited at 375 nm to obtain the emission spectra.

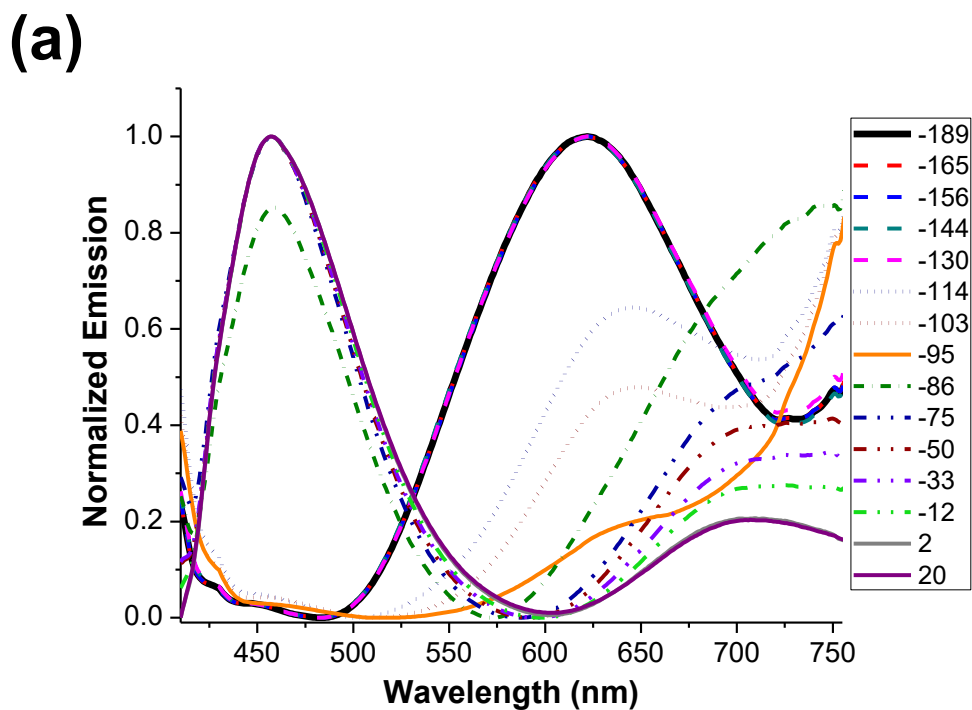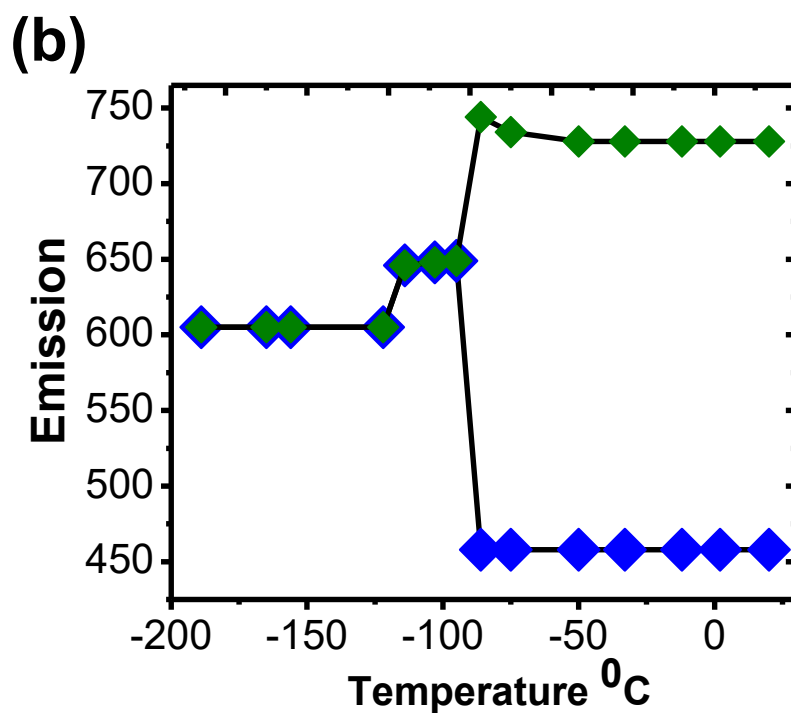

**Figure S6.** (a) Represents the normalized fluorescence spectra obtained for **3** ( $1 \times 10^{-5}$  M) in DMF in different temperatures. (b) represents the recorded fluorescence intensity as a function of temperature. Probe **3** was excited at 390 nm to obtain the emission spectra.

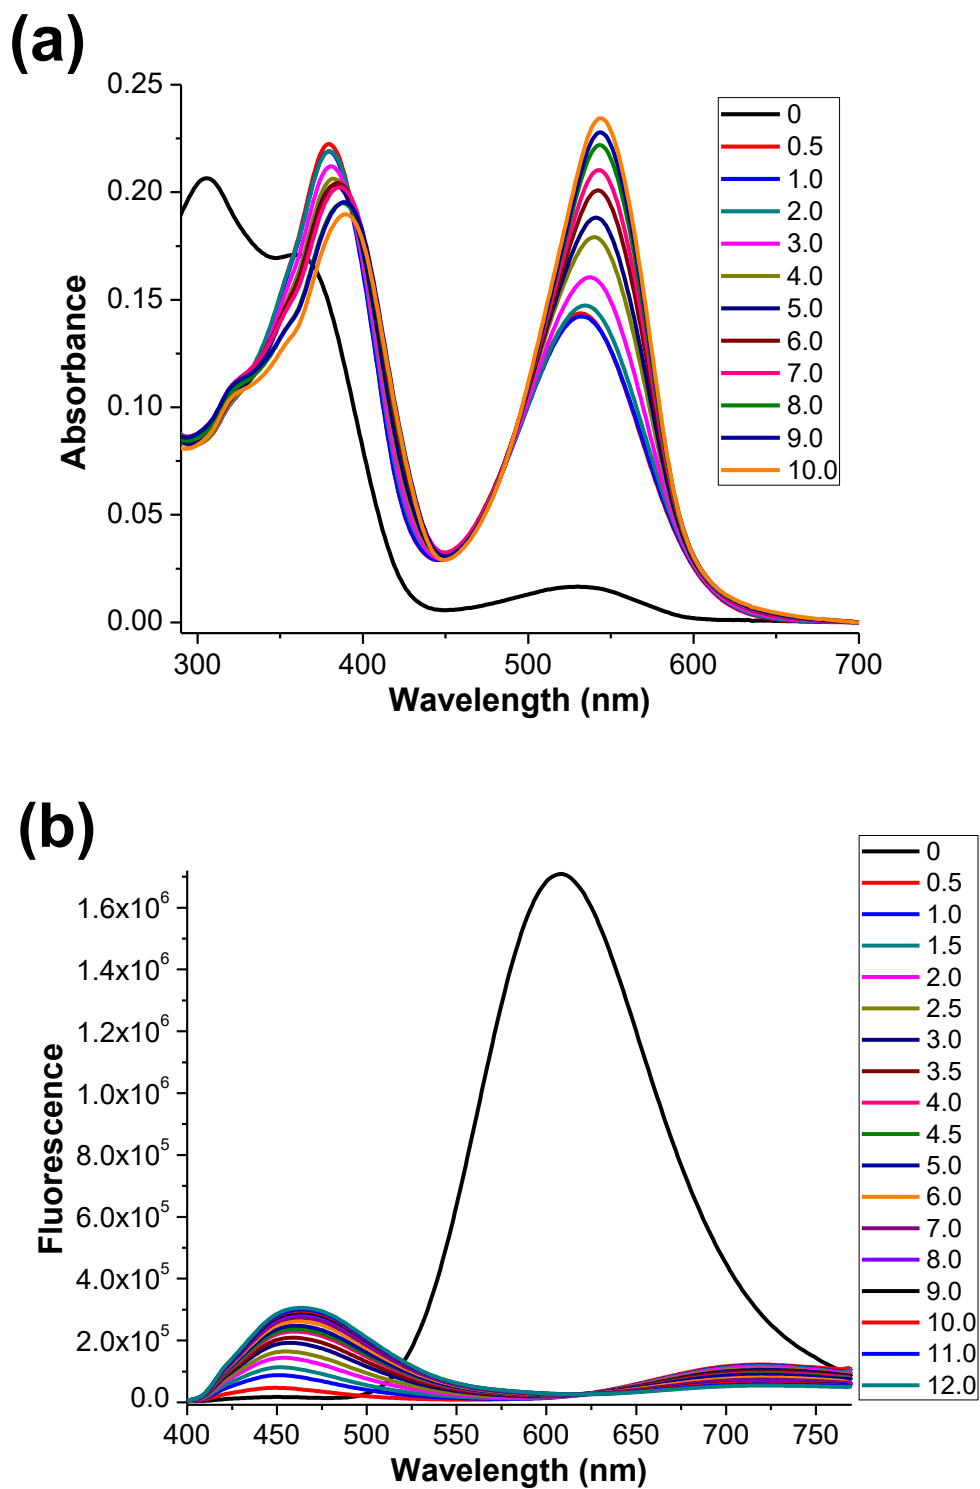

**Figure S7.** Spectrometric titration of the probe **3** ( $1 \times 10^{-5}$  M in acetonitrile) with the addition of  $\text{Bu}_4\text{NF}$  in acetonitrile at room temperature. Figure (a) and (b) represents the absorbance and emission spectra accordingly. Probe **3** was excited at 380 nm to record the emission spectra.

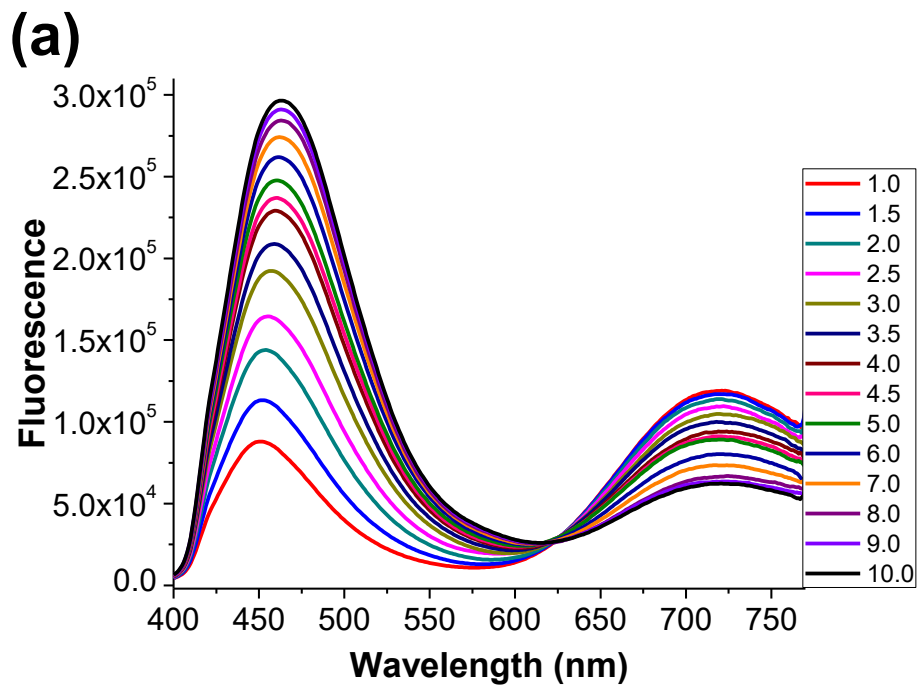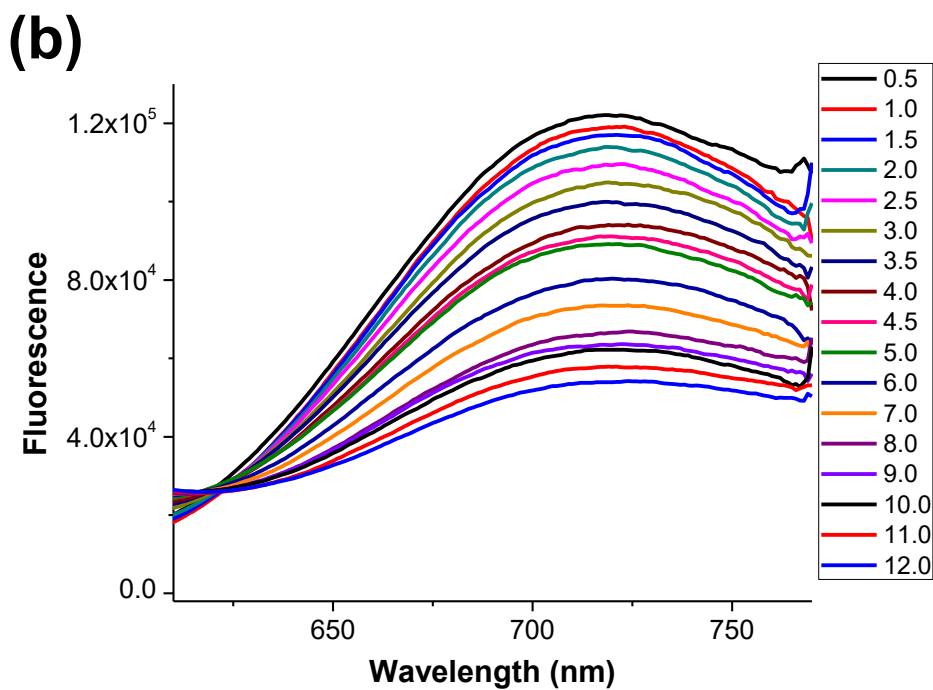

**Figure S8.** (a) Total emission recorded for the spectrometric titration of the probe **3** ( $1 \times 10^{-5}$  M in acetonitrile) with the addition of  $\text{Bu}_4\text{NF}$  (in acetonitrile) at room temperature. Figure (b) represents emission spectra recorded at 710 nm. Probe **3** was excited at 380 nm to record the emission spectra.

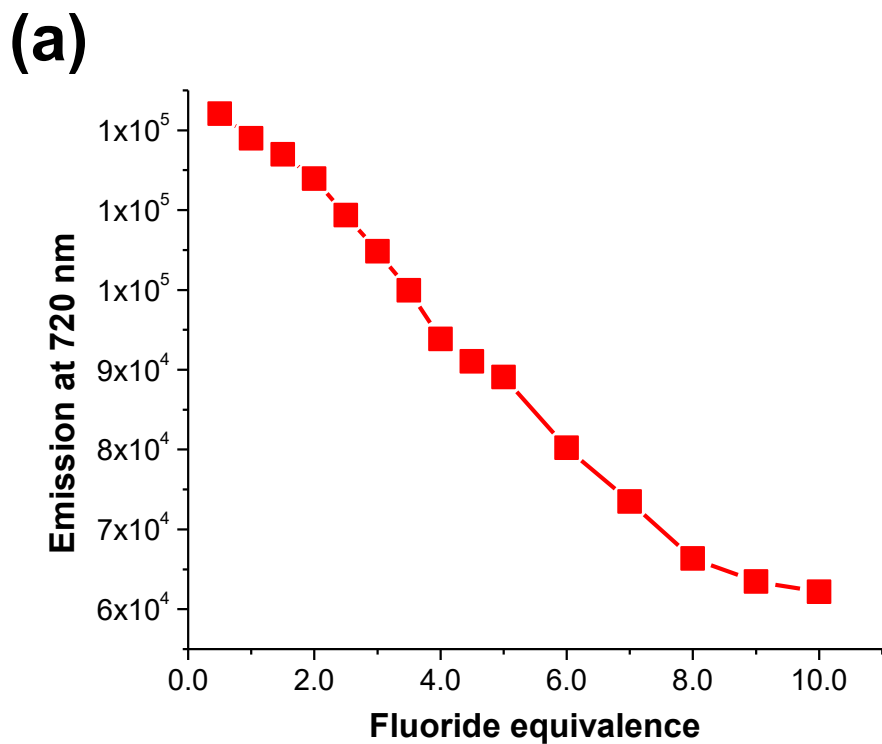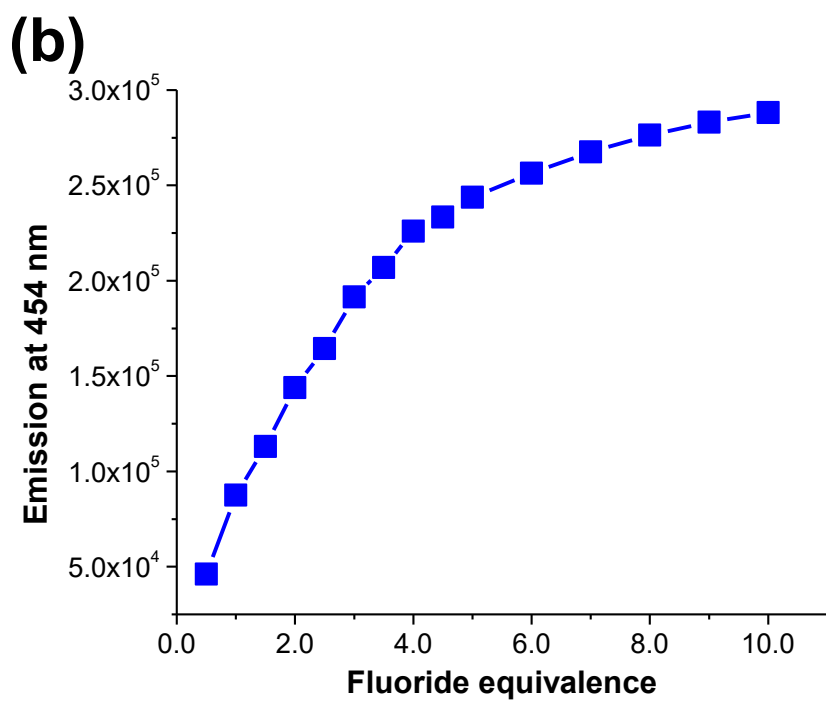

**Figure S9.** (a) The emission spectra recorded for the spectrometric titration of the probe **3** ( $1 \times 10^{-5}$  M in acetonitrile) with the addition of  $\text{Bu}_4\text{NF}$  (in acetonitrile) at 710 nm (a) and 450 nm (b).

Probe **3** was excited at 390 nm to record the emission spectra.

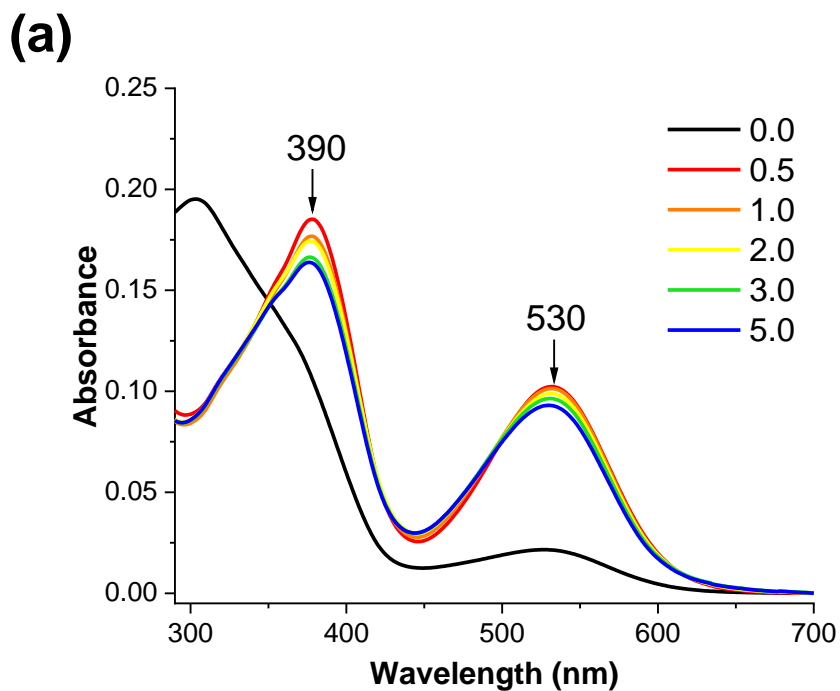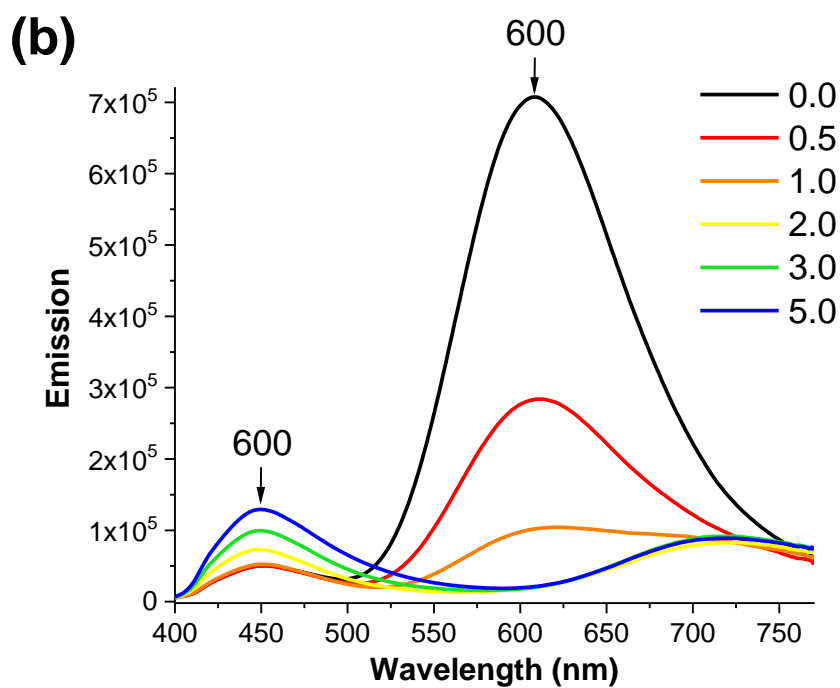

**Figure S10** Spectrometric titration of the probe **3** ( $1 \times 10^{-5}$  M in acetonitrile) with the addition of Bu<sub>4</sub>NOH in acetonitrile at room temperature, recorded from (a) the absorbance spectra (b) emission spectra with 380 nm excitation.

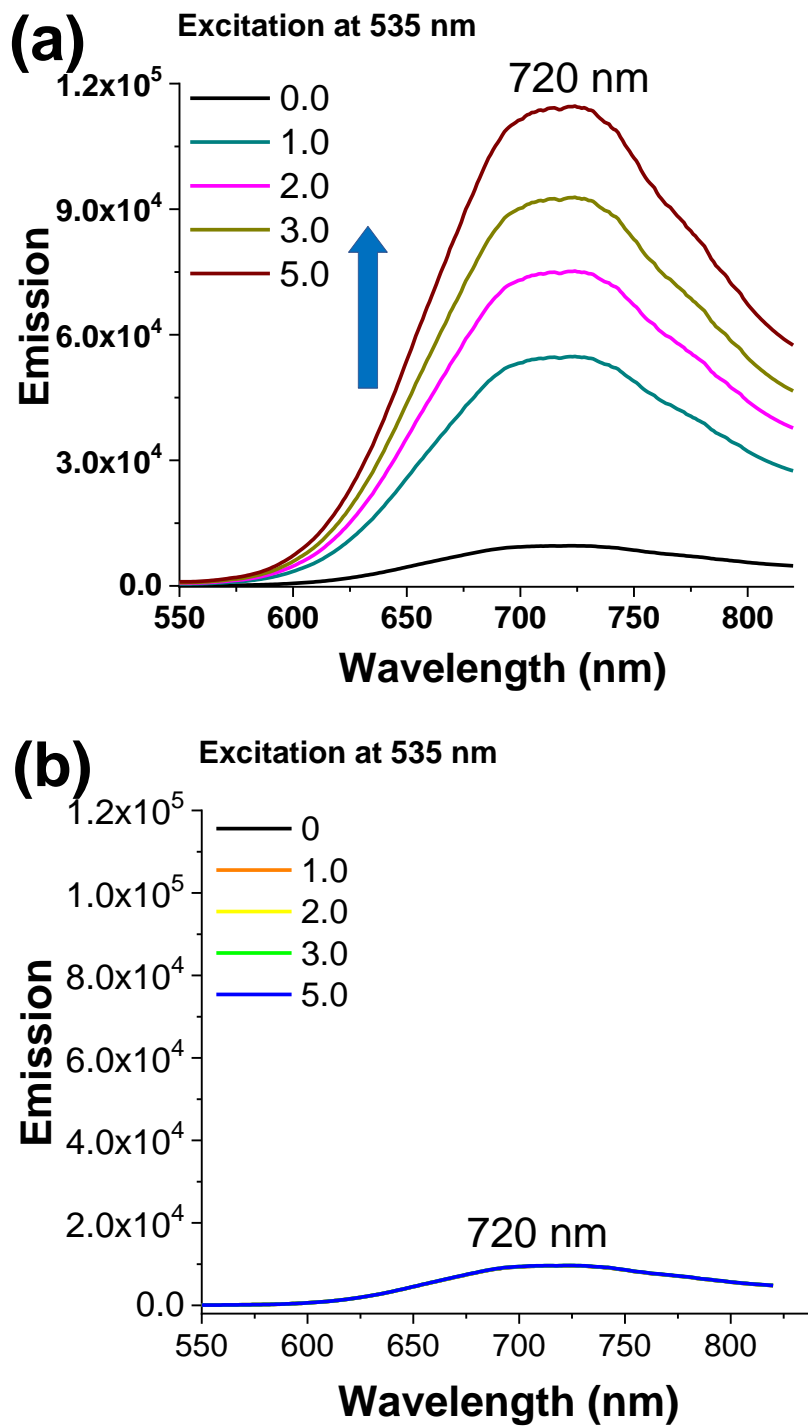

**Figure S11** The emission spectra recorded for spectrometric titration of the probe **3** ( $1 \times 10^{-5}$  M in acetonitrile) with the addition of  $\text{Bu}_4\text{NF}$  (a) and  $\text{Bu}_4\text{NOH}$  (b) in acetonitrile at room temperature. The emission spectra were recorded by exciting the probe at 535 nm.



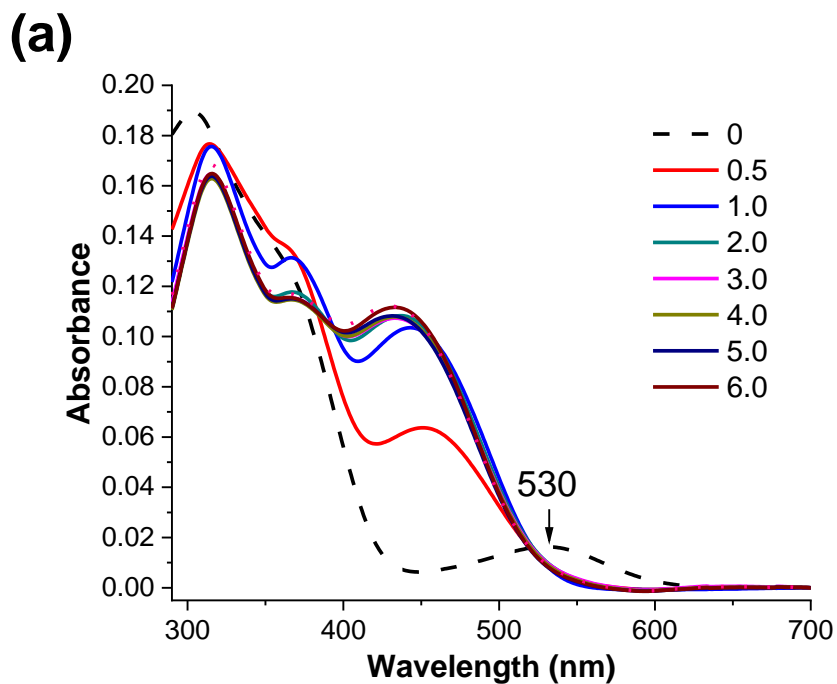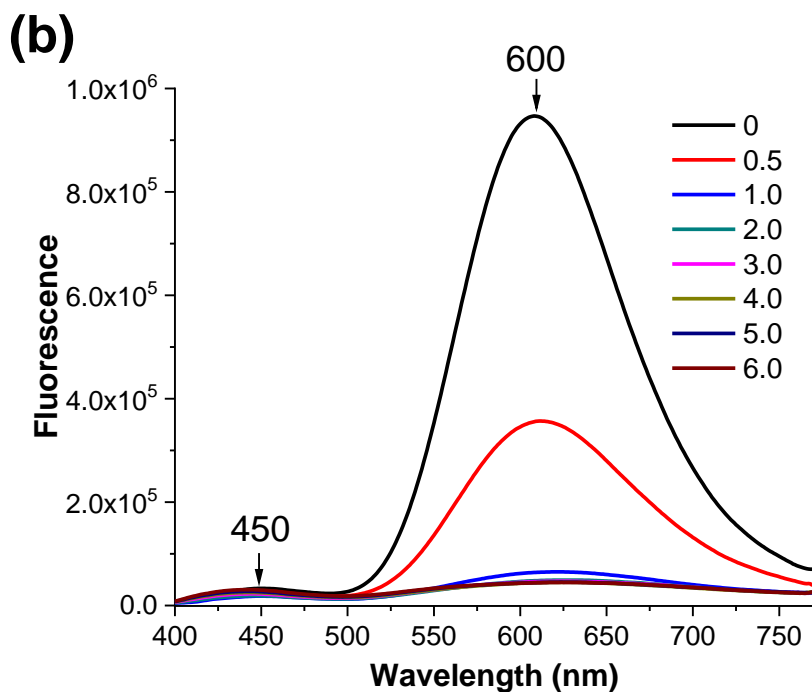

**Figure S12** Spectrometric titration of the probe **3** (1 x 10<sup>-5</sup> M in acetonitrile) with the addition of Bu<sub>4</sub>N<sup>+</sup>(CH<sub>3</sub>COO<sup>-</sup>) in acetonitrile at room temperature, showing the spectral response in the UV-vis absorption (a) and emission spectra with excitation at 380 nm (b).
